# Supplementary material for: Oxidative Stress in Association with Metabolic Health and Obesity in Young Adults
Source: Oxid Med Cell Longev. 2021 Jun 26;2021:9987352. doi: 10.1155/2021/9987352 (PMC8257366; doi:10.1155/2021/9987352)
Supplement: Supplementary Materials — Supplementary Table 1: oxidative stress parameters—differences in men with different metabolic status. Supplementary Table 2: oxidative stress parameters—differences in women with different metabolic status. [file 9987352.f1.zip]

Archive with 2 entries (2 files):
- Jakubiak et al. Supplementary Table 1..docx
- Jakubiak et al. Supplementary Table 2..docx
